# Supplementary material for: Lifestyle intervention to prevent excessive maternal weight gain: mother and infant follow-up at 12 months postpartum
Source: BMC Pregnancy Childbirth. 2015 Oct 15;15:265. doi: 10.1186/s12884-015-0701-2 (PMC4608142; doi:10.1186/s12884-015-0701-2)
Supplement: Supplementary file 1 — Supplementary material, results from multiple imputation analysis. (PDF 56 kb) [file 12884_2015_701_MOESM1_ESM.pdf]

## Supplement

### Maternal weight retention

Following multiple imputation, the estimated mean difference in 12 month weight retention between groups is -0.4 kg (-1.7, 0.9),  $p = 0.573$  in unadjusted analysis and -0.4 kg (-1.9, 1.1),  $p = 0.604$  in adjusted analysis. The estimated effect of GWG on 12 month weight retention is 0.3 kg (0.1, 0.4),  $p < 0.001$  in both unadjusted and adjusted analyses. The results for the association between dietary intake during pregnancy and weight retention at 12 months post-partum are given in Table 1.

### Infant outcomes

The estimated between group differences in infant weight at each follow-up time point, following multiple imputation, are given in Table 2. The effect of a 1 kg increase in GWG on the weight of infants at 12 months is estimated as 30 g (0, 61),  $p = 0.052$  in unadjusted analysis, and 21 g (-8, 50),  $p = 0.150$  in adjusted analysis. The results for the association between dietary intake during pregnancy and weight of infants at 12 months are given in Table 3.

17 Table 1. The association between reported dietary intake during pregnancy and weight retention at  
18 12 months post-partum (following multiple imputation)

| Dietary component                       | Unadjusted effect size (95% CI) | P <sup>a</sup> | Adjusted effect size (95% CI) | P <sup>b</sup> |
|-----------------------------------------|---------------------------------|----------------|-------------------------------|----------------|
| <b>Energy intake (100kcal/day)</b>      |                                 |                |                               |                |
| 16 <sup>th</sup> -18 <sup>th</sup> week | 0.10 (-0.06, 0.26)              | 0.233          | 0.08 (-0.08, 0.24)            | 0.330          |
| 36 <sup>th</sup> -38 <sup>th</sup> week | 0.07 (-0.10, 0.25)              | 0.405          | 0.05 (-0.12, 0.23)            | 0.545          |
| Change                                  | -0.03 (-0.21, 0.14)             | 0.696          | -0.03 (-0.21, 0.14)           | 0.720          |
| <b>Fat (g/day)</b>                      |                                 |                |                               |                |
| 16 <sup>th</sup> -18 <sup>th</sup> week | 0.02 (-0.02, 0.05)              | 0.336          | 0.01 (-0.02, 0.04)            | 0.478          |
| 36 <sup>th</sup> -38 <sup>th</sup> week | 0.01 (-0.02, 0.04)              | 0.564          | 0.01 (-0.02, 0.04)            | 0.676          |
| Change                                  | -0.01 (-0.04, 0.03)             | 0.701          | -0.00 (-0.04, 0.03)           | 0.793          |
| <b>Carbohydrates (g/day)</b>            |                                 |                |                               |                |
| 16 <sup>th</sup> -18 <sup>th</sup> week | 0.01 (-0.01, 0.02)              | 0.316          | 0.01 (-0.01, 0.02)            | 0.382          |
| 36 <sup>th</sup> -38 <sup>th</sup> week | 0.00 (-0.01, 0.02)              | 0.633          | 0.00 (-0.01, 0.01)            | 0.818          |
| Change                                  | -0.00 (-0.02, 0.01)             | 0.661          | -0.00 (-0.02, 0.01)           | 0.577          |
| <b>Protein (g/day)</b>                  |                                 |                |                               |                |
| 16 <sup>th</sup> -18 <sup>th</sup> week | 0.03 (-0.01, 0.07)              | 0.141          | 0.03 (-0.01, 0.06)            | 0.206          |
| 36 <sup>th</sup> -38 <sup>th</sup> week | 0.02 (-0.02, 0.06)              | 0.306          | 0.02 (-0.02, 0.06)            | 0.295          |
| Change                                  | -0.01 (-0.05, 0.04)             | 0.817          | -0.00 (-0.04, 0.04)           | 0.967          |
| <b>Fibre (g/day)</b>                    |                                 |                |                               |                |
| 16 <sup>th</sup> -18 <sup>th</sup> week | 0.01 (-0.09, 0.10)              | 0.861          | -0.02 (-0.12, 0.08)           | 0.705          |
| 36 <sup>th</sup> -38 <sup>th</sup> week | -0.00 (-0.10, 0.10)             | 0.949          | -0.02 (-0.12, 0.08)           | 0.654          |
| Change                                  | -0.01 (-0.11, 0.10)             | 0.882          | -0.01 (-0.12, 0.10)           | 0.907          |

19 Effect sizes from regression models as estimated marginal mean difference (95% CI)

20 a) unadjusted model

21 b) linear mixed model adjusted for practice (random factor), maternal age, pre-pregnancy BMI, time of follow-  
22 up and group

23 Table 2. Infant weight at follow-up visits in each group and the estimated mean weight differences  
 24 between the groups (following multiple imputation)

| <b>Time point</b> | <b>Unadjusted effect size (95% CI)</b> | <b>P<sup>a)</sup></b> | <b>Adjusted effect size (95%CI)</b> | <b>P<sup>b)</sup></b> |
|-------------------|----------------------------------------|-----------------------|-------------------------------------|-----------------------|
| <b>U2</b>         | 8 (-101, 116)                          | 0.892                 | 25 (-15, 64)                        | 0.220                 |
| <b>U3</b>         | -22 (-172, 129)                        | 0.777                 | -18 (-115, 78)                      | 0.707                 |
| <b>U4</b>         | -176 (-394, 43)                        | 0.114                 | -166 (-381, 49)                     | 0.130                 |
| <b>U5</b>         | -250 (-514, 14)                        | 0.063                 | -203 (-446, 40)                     | 0.101                 |
| <b>U6</b>         | -368 (-634, -103)                      | 0.007                 | -259 (-516, -2)                     | 0.048                 |

25 Effect sizes from regression models as estimated marginal mean difference (95% CI)

26 a) unadjusted model

27 b) linear mixed model adjusted for practice (random factor), maternal age and pre-pregnancy BMI, infant age  
 28 at follow-up and birth weight

29 Table 3. The association between reported dietary intake during pregnancy and infant weight at 12  
30 months (following multiple imputation)

| Dietary component                       | Unadjusted effect size (95% CI) | P <sup>a</sup> | Adjusted effect size (95% CI) | P <sup>b</sup> |
|-----------------------------------------|---------------------------------|----------------|-------------------------------|----------------|
| <b>Energy intake (100kcal/day)</b>      |                                 |                |                               |                |
| 16 <sup>th</sup> -18 <sup>th</sup> week | -18 (-51, 15)                   | 0.278          | -10 (-41, 21)                 | 0.524          |
| 36 <sup>th</sup> -38 <sup>th</sup> week | 1 (-41, 42)                     | 0.977          | 6 (-31, 43)                   | 0.756          |
| Change                                  | 19 (-20, 58)                    | 0.342          | 15 (-20, 51)                  | 0.384          |
| <b>Fat (g/day)</b>                      |                                 |                |                               |                |
| 16 <sup>th</sup> -18 <sup>th</sup> week | -3 (-10, 4)                     | 0.355          | -2 (-8, 4)                    | 0.559          |
| 36 <sup>th</sup> -38 <sup>th</sup> week | 0 (-7, 8)                       | 0.947          | 1 (-6, 7)                     | 0.825          |
| Change                                  | 3 (-4, 11)                      | 0.385          | 3 (-4, 9)                     | 0.466          |
| <b>Carbohydrates (g/day)</b>            |                                 |                |                               |                |
| 16 <sup>th</sup> -18 <sup>th</sup> week | -1 (-4, 1)                      | 0.300          | -1 (-3, 2)                    | 0.527          |
| 36 <sup>th</sup> -38 <sup>th</sup> week | 0 (-3, 3)                       | 0.990          | 0 (-2, 3)                     | 0.746          |
| Change                                  | 1 (-1, 4)                       | 0.358          | 1 (-1, 3)                     | 0.356          |
| <b>Protein (g/day)</b>                  |                                 |                |                               |                |
| 16 <sup>th</sup> -18 <sup>th</sup> week | -1 (-10, 7)                     | 0.777          | 0 (-7, 8)                     | 0.905          |
| 36 <sup>th</sup> -38 <sup>th</sup> week | 1 (-9, 12)                      | 0.807          | 1 (-8, 11)                    | 0.775          |
| Change                                  | 2 (-8, 12)                      | 0.670          | 1 (-8, 10)                    | 0.863          |
| <b>Fibre (g/day)</b>                    |                                 |                |                               |                |
| 16 <sup>th</sup> -18 <sup>th</sup> week | -9 (-29, 12)                    | 0.403          | 1 (-18, 20)                   | 0.887          |
| 36 <sup>th</sup> -38 <sup>th</sup> week | -3 (-25, 19)                    | 0.764          | -1 (-21, 19)                  | 0.938          |
| Change                                  | 4 (-19, 26)                     | 0.755          | -2 (-23, 19)                  | 0.857          |

31 Effect sizes from regression models as estimated marginal mean difference (95% CI)

32 a) unadjusted model

33 b) linear mixed model adjusted for practice (random factor), maternal age and pre-pregnancy BMI, infant age  
34 at follow-up, birth weight and group

35
